# Supplementary material
Source: MDPI journal article supplement (https://www.mdpi.com/2311-7524/9/8/918)

Figure S2. Segmental duplication of the *PgLAC* genes in pomegranate. Segmental duplicated genes are indicated by red lines. The scale on the circle is in million bases (Mb).

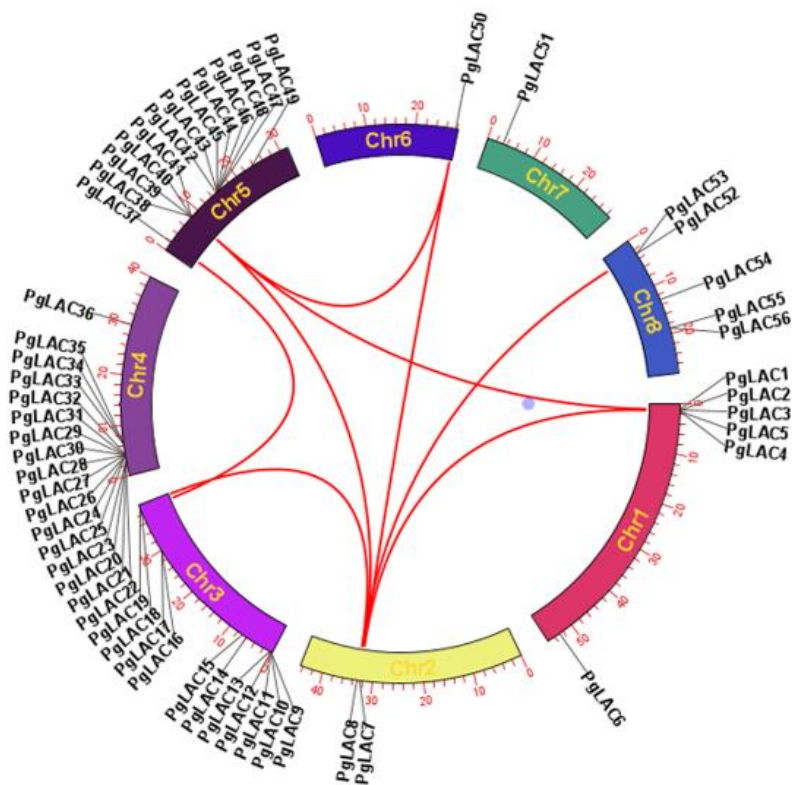

Supplement: s1 [file s1]
