# Supplementary material
Source: MDPI journal article supplement (https://www.mdpi.com/2311-7524/9/8/918)

Figure S1 The amino acid sequences for each motif (Motif 1-Motif 10)

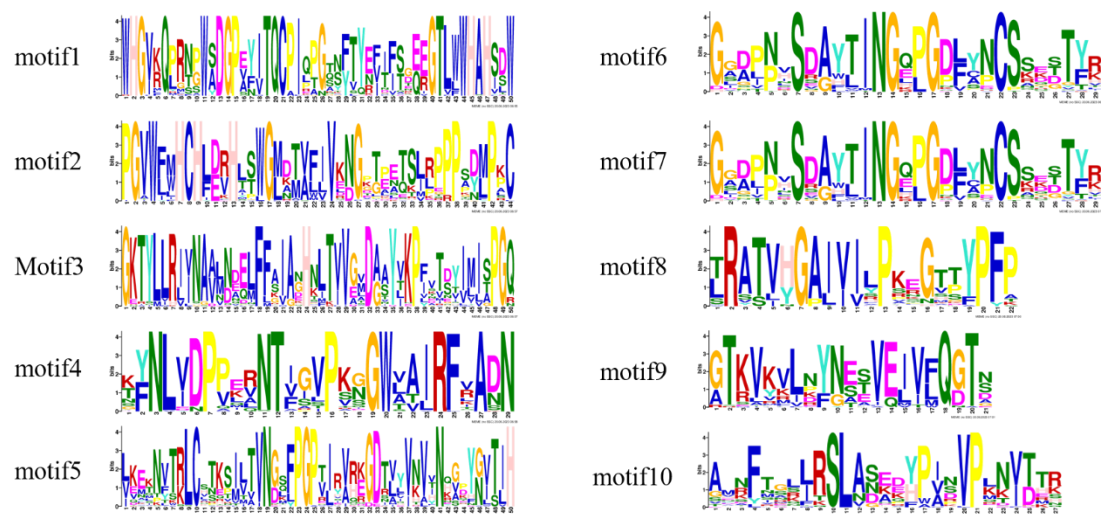

Supplement: s1 [file s1]
